# Supplementary material for: Experimental and theoretical investigation of the chemical exfoliation of Cr-based MAX phase particles
Source: Royal Society of Chemistry journal article supplement (doi:10.1039/d0dt01448f), 2020-01-01
Supplement: d0dt01448f1.pdf [file d0dt01448f1.pdf]

## Experimental and theoretical investigation of the chemical exfoliation of Cr-based MAX phase particles

Minh Hai Tran,<sup>a</sup> Ali M. Malik,<sup>g</sup> Michael Dürrschnabel,<sup>d</sup> Anna Regoutz,<sup>e</sup> Pardeep Thakur,<sup>f</sup> Tien-Lin Lee,<sup>f</sup> Delwin Perera,<sup>g</sup> Leopoldo Molina-Luna,<sup>c</sup> Karsten Albe,<sup>g</sup> Jochen Rohrer,<sup>g</sup> and Christina S. Birkel<sup>\*a,b</sup>

Supplementary Information

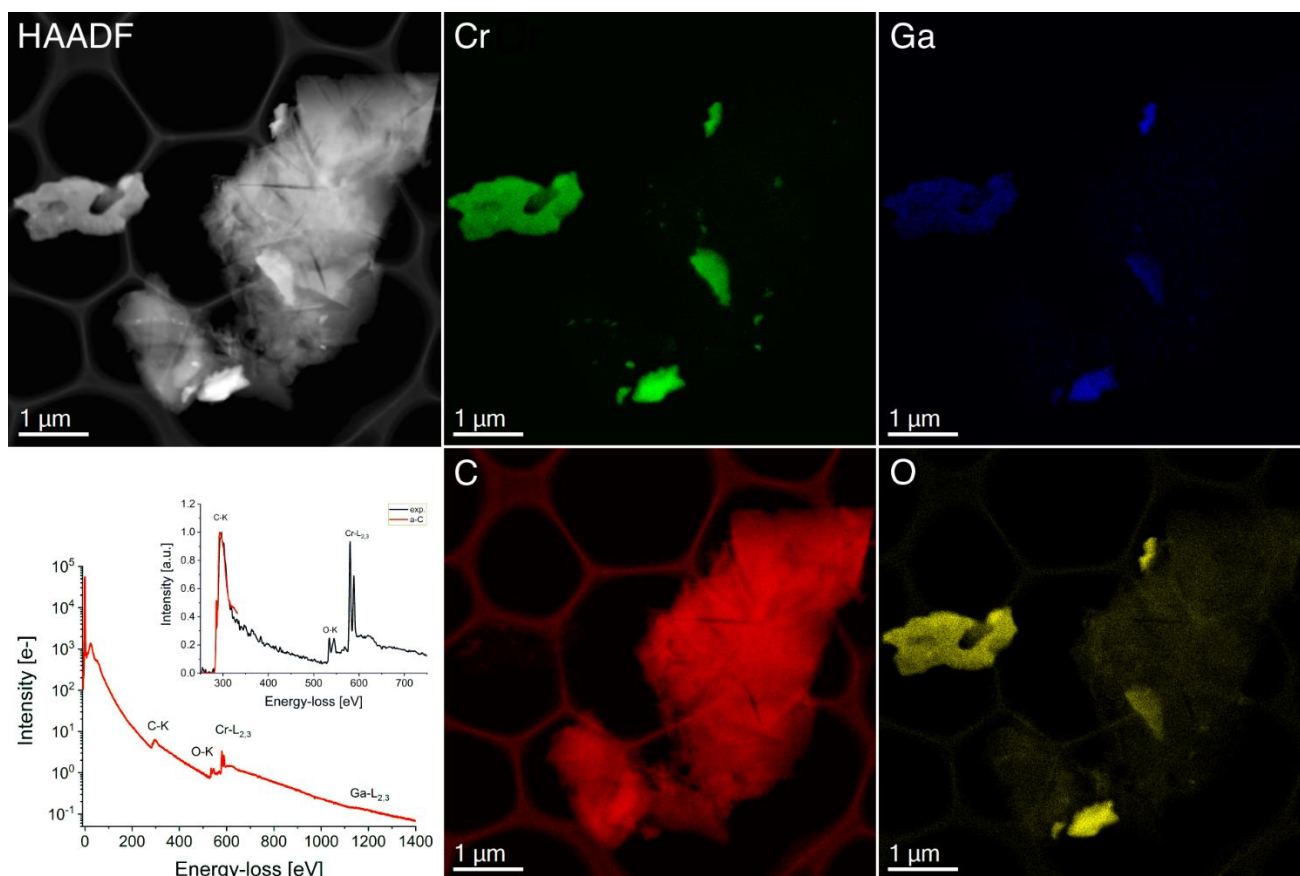

**Figure SI-1:** STEM-EDX elemental mapping of chromium oxide particles embedded in amorphous carbon and a wide range STEM-EELS measurement (lower left graph) of a single chromium oxide particle.

**Table SI-1:** Quantitative analysis of a STEM-EELS measurement of a single  $\alpha$ -Cr<sub>2</sub>O<sub>3</sub> particle.

| Element | Composition [at%] | Nominal composition [at%] |
|---------|-------------------|---------------------------|
| O       | 65                | 60                        |
| Cr      | 35                | 40                        |

Figure SI-1 shows a STEM-EDX mapping of several  $\alpha$ -Cr<sub>2</sub>O<sub>3</sub> particles surrounded by amorphous carbon, which is believed to be a residue of the exfoliation or TEM sample preparation process. The STEM-HAADF

image shows a bright contrast for the  $\alpha$ -Cr<sub>2</sub>O<sub>3</sub> particles due to their larger average Z value. The elemental maps of Cr and O show exactly at these locations an elemental signal. The Ga map reveals that the  $\alpha$ -Cr<sub>2</sub>O<sub>3</sub> particles also contain residual amounts of Ga (about 1-2 at%). The wide range STEM-EELS spectrum (see EELS graph on lower left of Figure SI-1) reveals that C, O, Cr, and Ga are present. The C is due to the amorphous surrounding, whereas Cr, O, and Ga are forming the particles. Table SI-1 reveals that the measured Cr and O contents are close to the nominal ones. The slight excess in O might be due to surrounding C, which can also contain a few at% of O. Inspecting the electron near edge fine-structure (ELNES) of O (see inset in EELS graph on lower left of Figure SI-1) one recognizes that it fits well to that of  $\alpha$ -Cr<sub>2</sub>O<sub>3</sub>.

The STEM-EDX line profile shown in Figure SI-2 confirms the finding from the mapping in Figure 4 of the original manuscript that an almost perfect Cr:C ratio of 60:40 is detected.

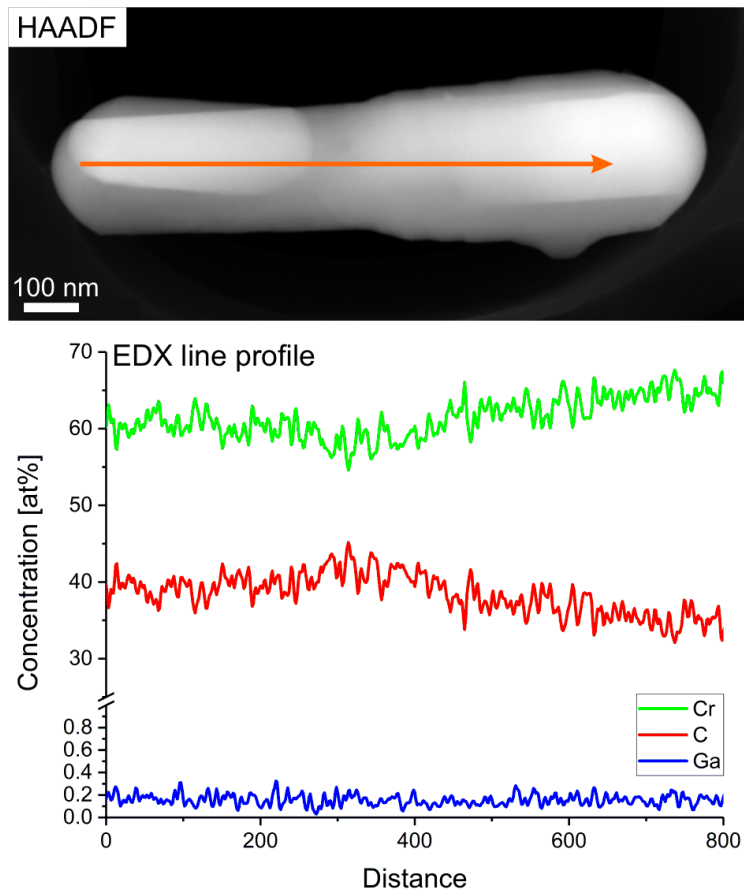

**Figure SI-2:** STEM-EDX line profile carried out across the particle analyzed in Figure 4 of the manuscript.

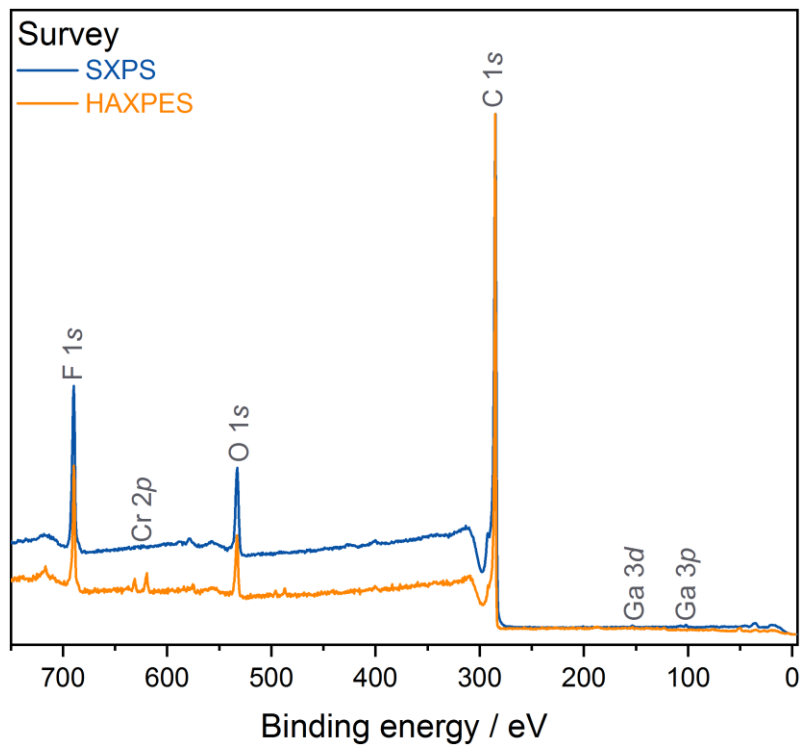

**Figure SI-3:** Survey SXPS and HAXPES spectra of the HF-treated sample.
